# Supplementary material for: Molecular features of early- vs. late-onset gastric cancer: a systematic review and meta-analysis
Source: Research Square preprint supplement (doi:10.21203/rs.3.rs-6435874/v1), 2025-05-16
Supplement: Supplementary file 1 [file 1e5b22bca8a4e0091822acf3.docx]

**Newcastle–Ottawa Scale (NOS) Quality Assessment Results**

| **Study** | **Selection** | | | | **Comparability** | | **Exposure** | | | **Total** |
| --- | --- | --- | --- | --- | --- | --- | --- | --- | --- | --- |
| **1.1** | **1.2** | **1.3** | **1.4** | **2.1** | **2.2** | **3.1** | **3.2** | **3.3** |
| Haruma et al, 2000 | 1 | 0 | 1 | 1 | 1 | 1 | 1 | 1 | 1 | 8 |
| Milne et al, 2006 | 1 | 1 | 1 | 1 | 1 | 1 | 1 | 1 | 1 | 9 |
| Park et al, 2009 | 0 | 1 | 1 | 1 | 1 | 1 | 1 | 1 | 0 | 7 |
| Moelans et al, 2011 | 1 | 1 | 1 | 1 | 1 | 1 | 1 | 1 | 1 | 9 |
| Qiu et al, 2011 | 1 | 0 | 1 | 1 | 1 | 1 | 1 | 1 | 1 | 8 |
| Schildberg et al, 2013 | 0 | 0 | 1 | 1 | 1 | 1 | 1 | 1 | 1 | 7 |
| Schildberg et al, 2014 | 0 | 0 | 1 | 1 | 1 | 1 | 1 | 1 | 1 | 7 |
| Gurzu et al, 2015 | 1 | 0 | 1 | 1 | 1 | 1 | 1 | 1 | 0 | 7 |
| Cho et al, 2017 | 0 | 1 | 1 | 1 | 1 | 1 | 1 | 1 | 1 | 8 |
| Wei et al, 2018 | 1 | 0 | 1 | 1 | 1 | 1 | 1 | 1 | 1 | 8 |
| Hakkaart et al, 2019 | 0 | 0 | 1 | 1 | 1 | 0 | 1 | 1 | 1 | 6 |
| Choi et al, 2020 | 1 | 0 | 1 | 1 | 1 | 1 | 1 | 1 | 1 | 8 |
| Machlowska et al, 2020 | 1 | 1 | 1 | 1 | 1 | 1 | 1 | 1 | 1 | 9 |
| Moore et al, 2020 | 1 | 1 | 0 | 1 | 1 | 1 | 1 | 1 | 1 | 8 |
| Huang et al, 2021 | 1 | 0 | 1 | 1 | 1 | 1 | 1 | 1 | 1 | 8 |
| Setia et al, 2021 | 1 | 1 | 0 | 1 | 1 | 0 | 0 | 1 | 1 | 6 |
| Qu et al, 2022 | 1 | 0 | 1 | 1 | 1 | 1 | 1 | 1 | 0 | 7 |
| Zhou et al, 2022 | 1 | 1 | 1 | 1 | 1 | 1 | 1 | 1 | 1 | 9 |
| Chu et al, 2023 | 0 | 0 | 1 | 1 | 1 | 1 | 1 | 1 | 1 | 7 |
| Han et al, 2024 | 1 | 1 | 0 | 1 | 1 | 0 | 0 | 1 | 1 | 6 |
| Liu et al, 2024 | 1 | 0 | 1 | 1 | 1 | 1 | 1 | 1 | 1 | 8 |
| Lumish et al, 2024 | 0 | 1 | 1 | 1 | 1 | 1 | 1 | 1 | 1 | 8 |
