# Supplementary material for: Molecular features of early- vs. late-onset gastric cancer: a systematic review and meta-analysis
Source: Research Square preprint supplement (doi:10.21203/rs.3.rs-6435874/v1), 2025-05-16
Supplement: Supplementary file 2 [file 34bc0ee6d1d45b826b37576b.docx]

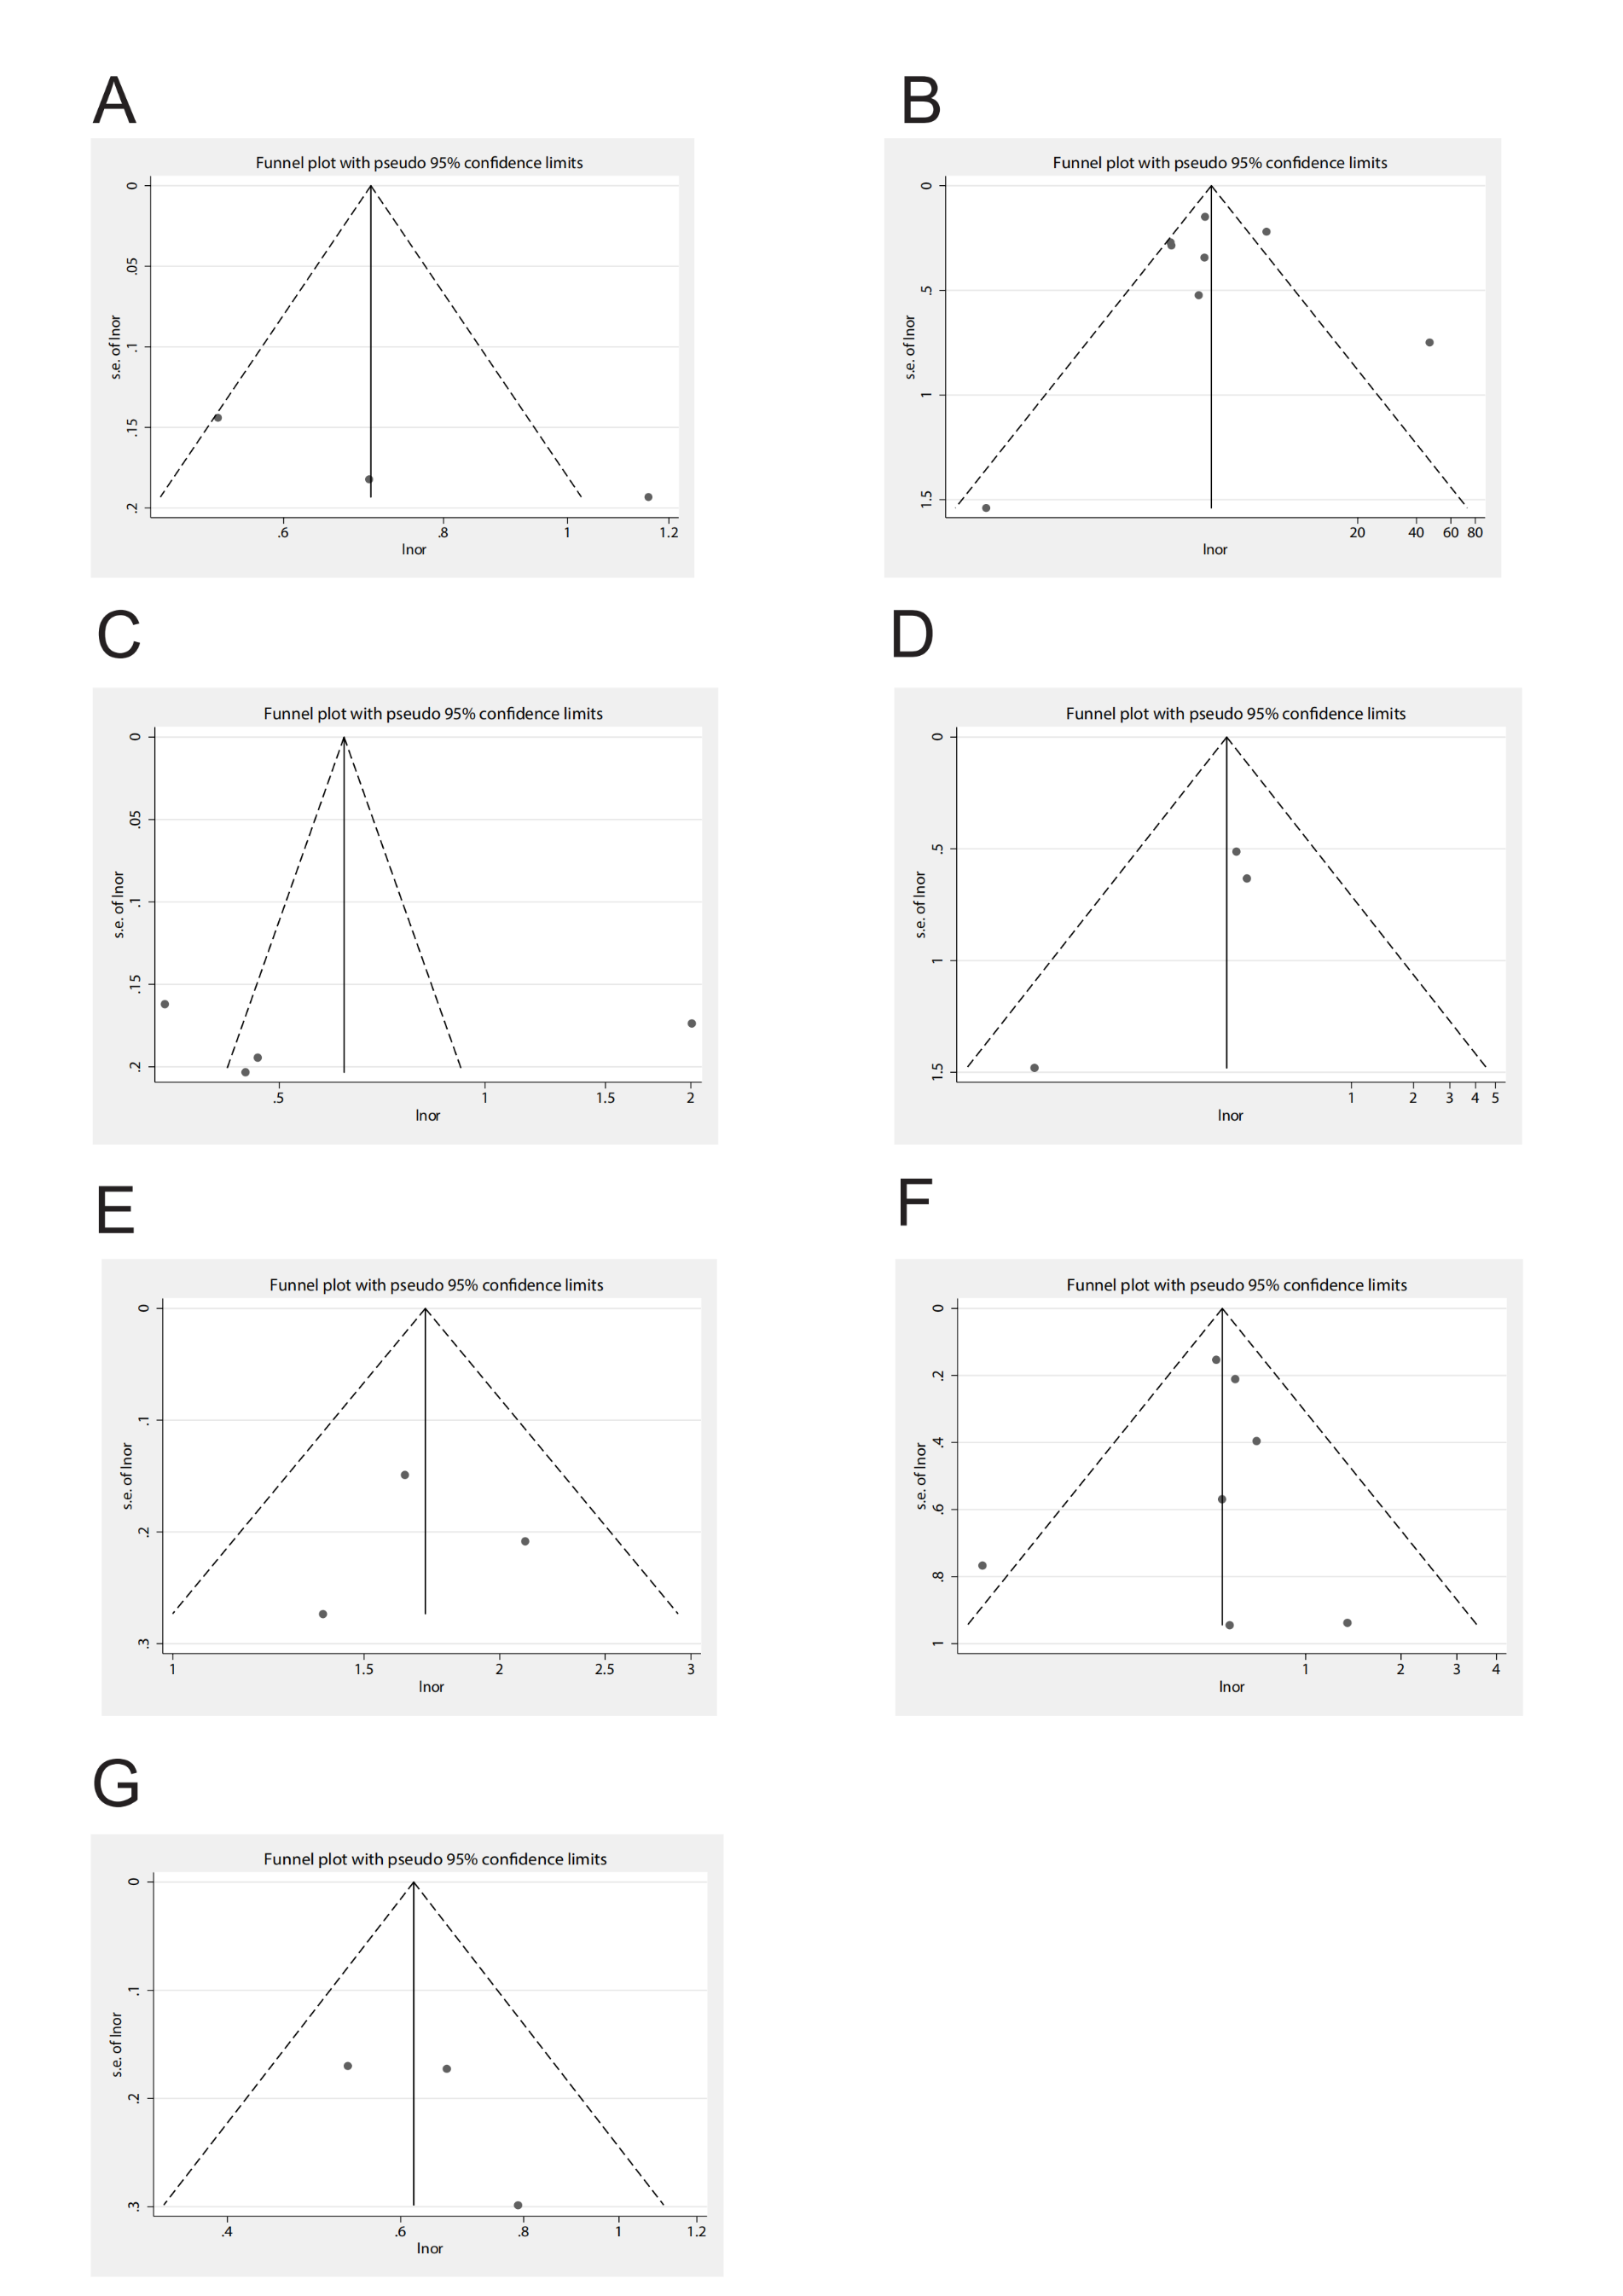


**Supplementary Fig. S3.** Funnel plots showed no evidence of publication bias among the included studies: (A) CA19-9, (B) *CDH1* mutation, (C) CEA, (D) CIN subtype, (E) dMMR/MSI-H, (F) GS subtype, and (G) HER2.


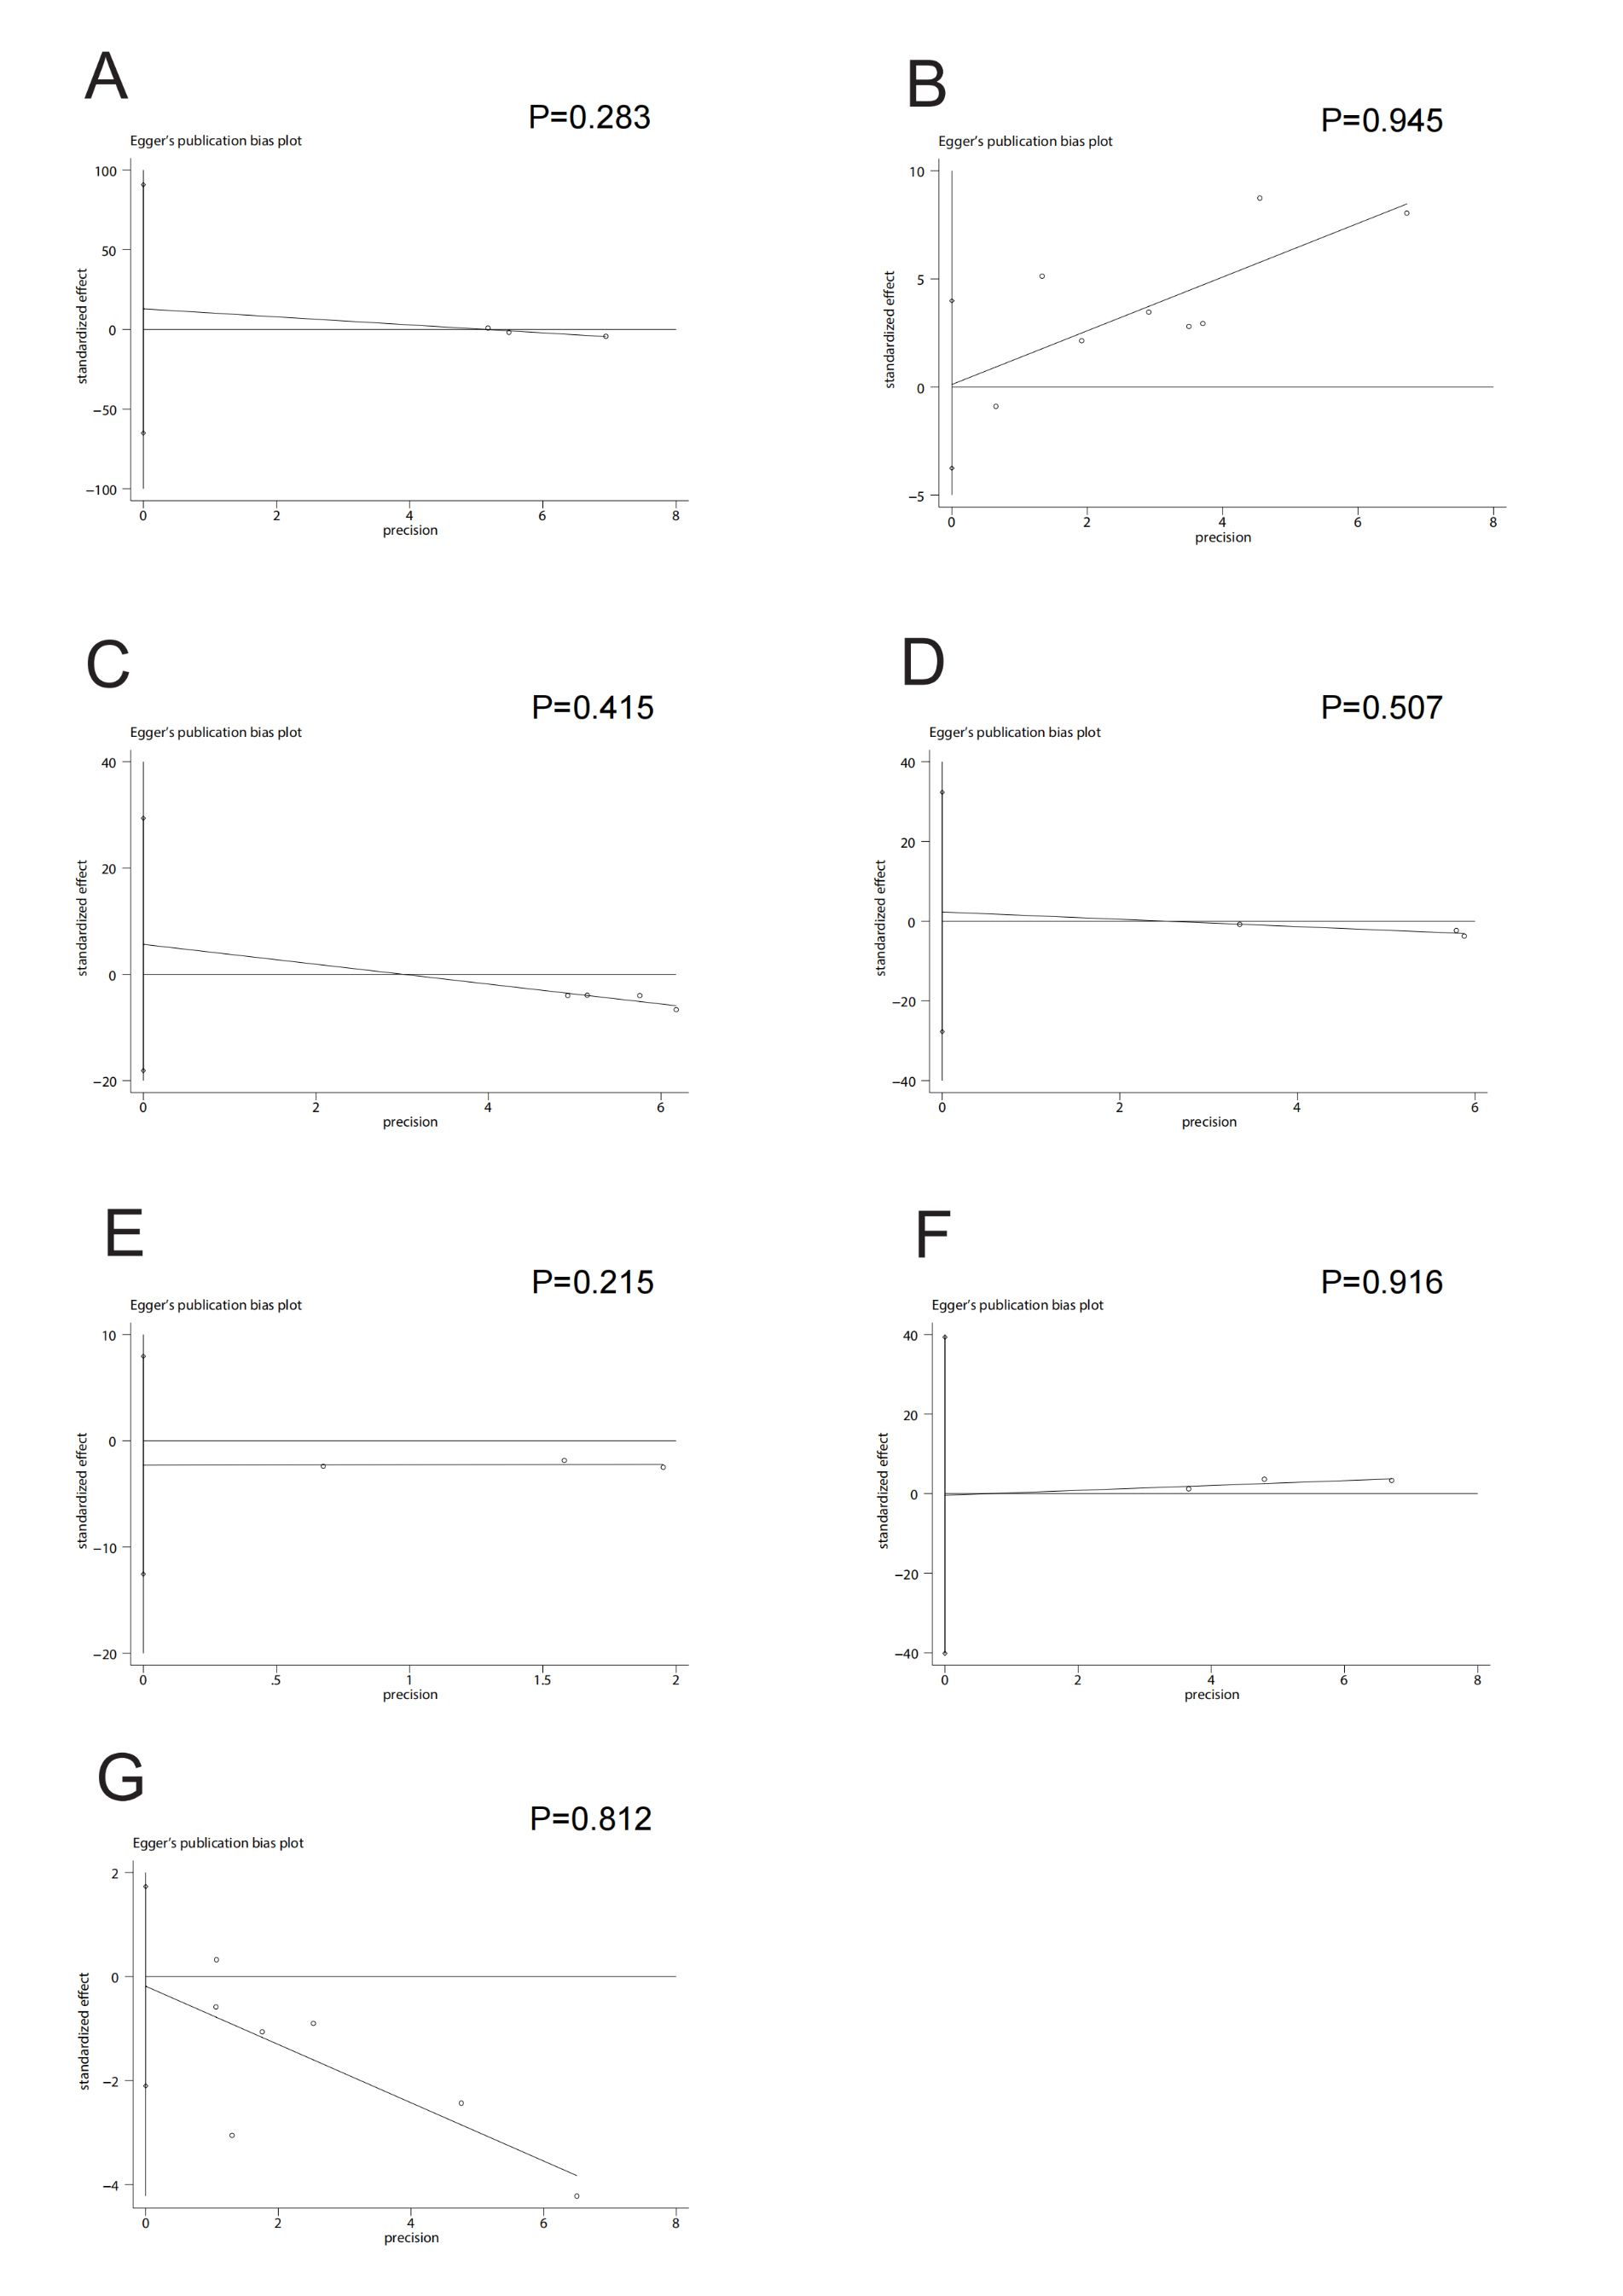


**Supplementary Fig. S4.** Egger’s test indicated no significant publication bias among the included studies: (A) CA19-9 (P = 0.283), (B) *CDH1* mutation (P = 0.945), (C) CEA (P = 0.415), (D) CIN subtype (P = 0.507), (E) dMMR/MSI-H, (F) GS subtype, and (G) HER2.
