# Supplementary material for: Molecular features of early- vs. late-onset gastric cancer: a systematic review and meta-analysis
Source: Research Square preprint supplement (doi:10.21203/rs.3.rs-6435874/v1), 2025-05-16
Supplement: Supplementary file 3 [file 61dbfac8b6648a19b65faf2d.docx]

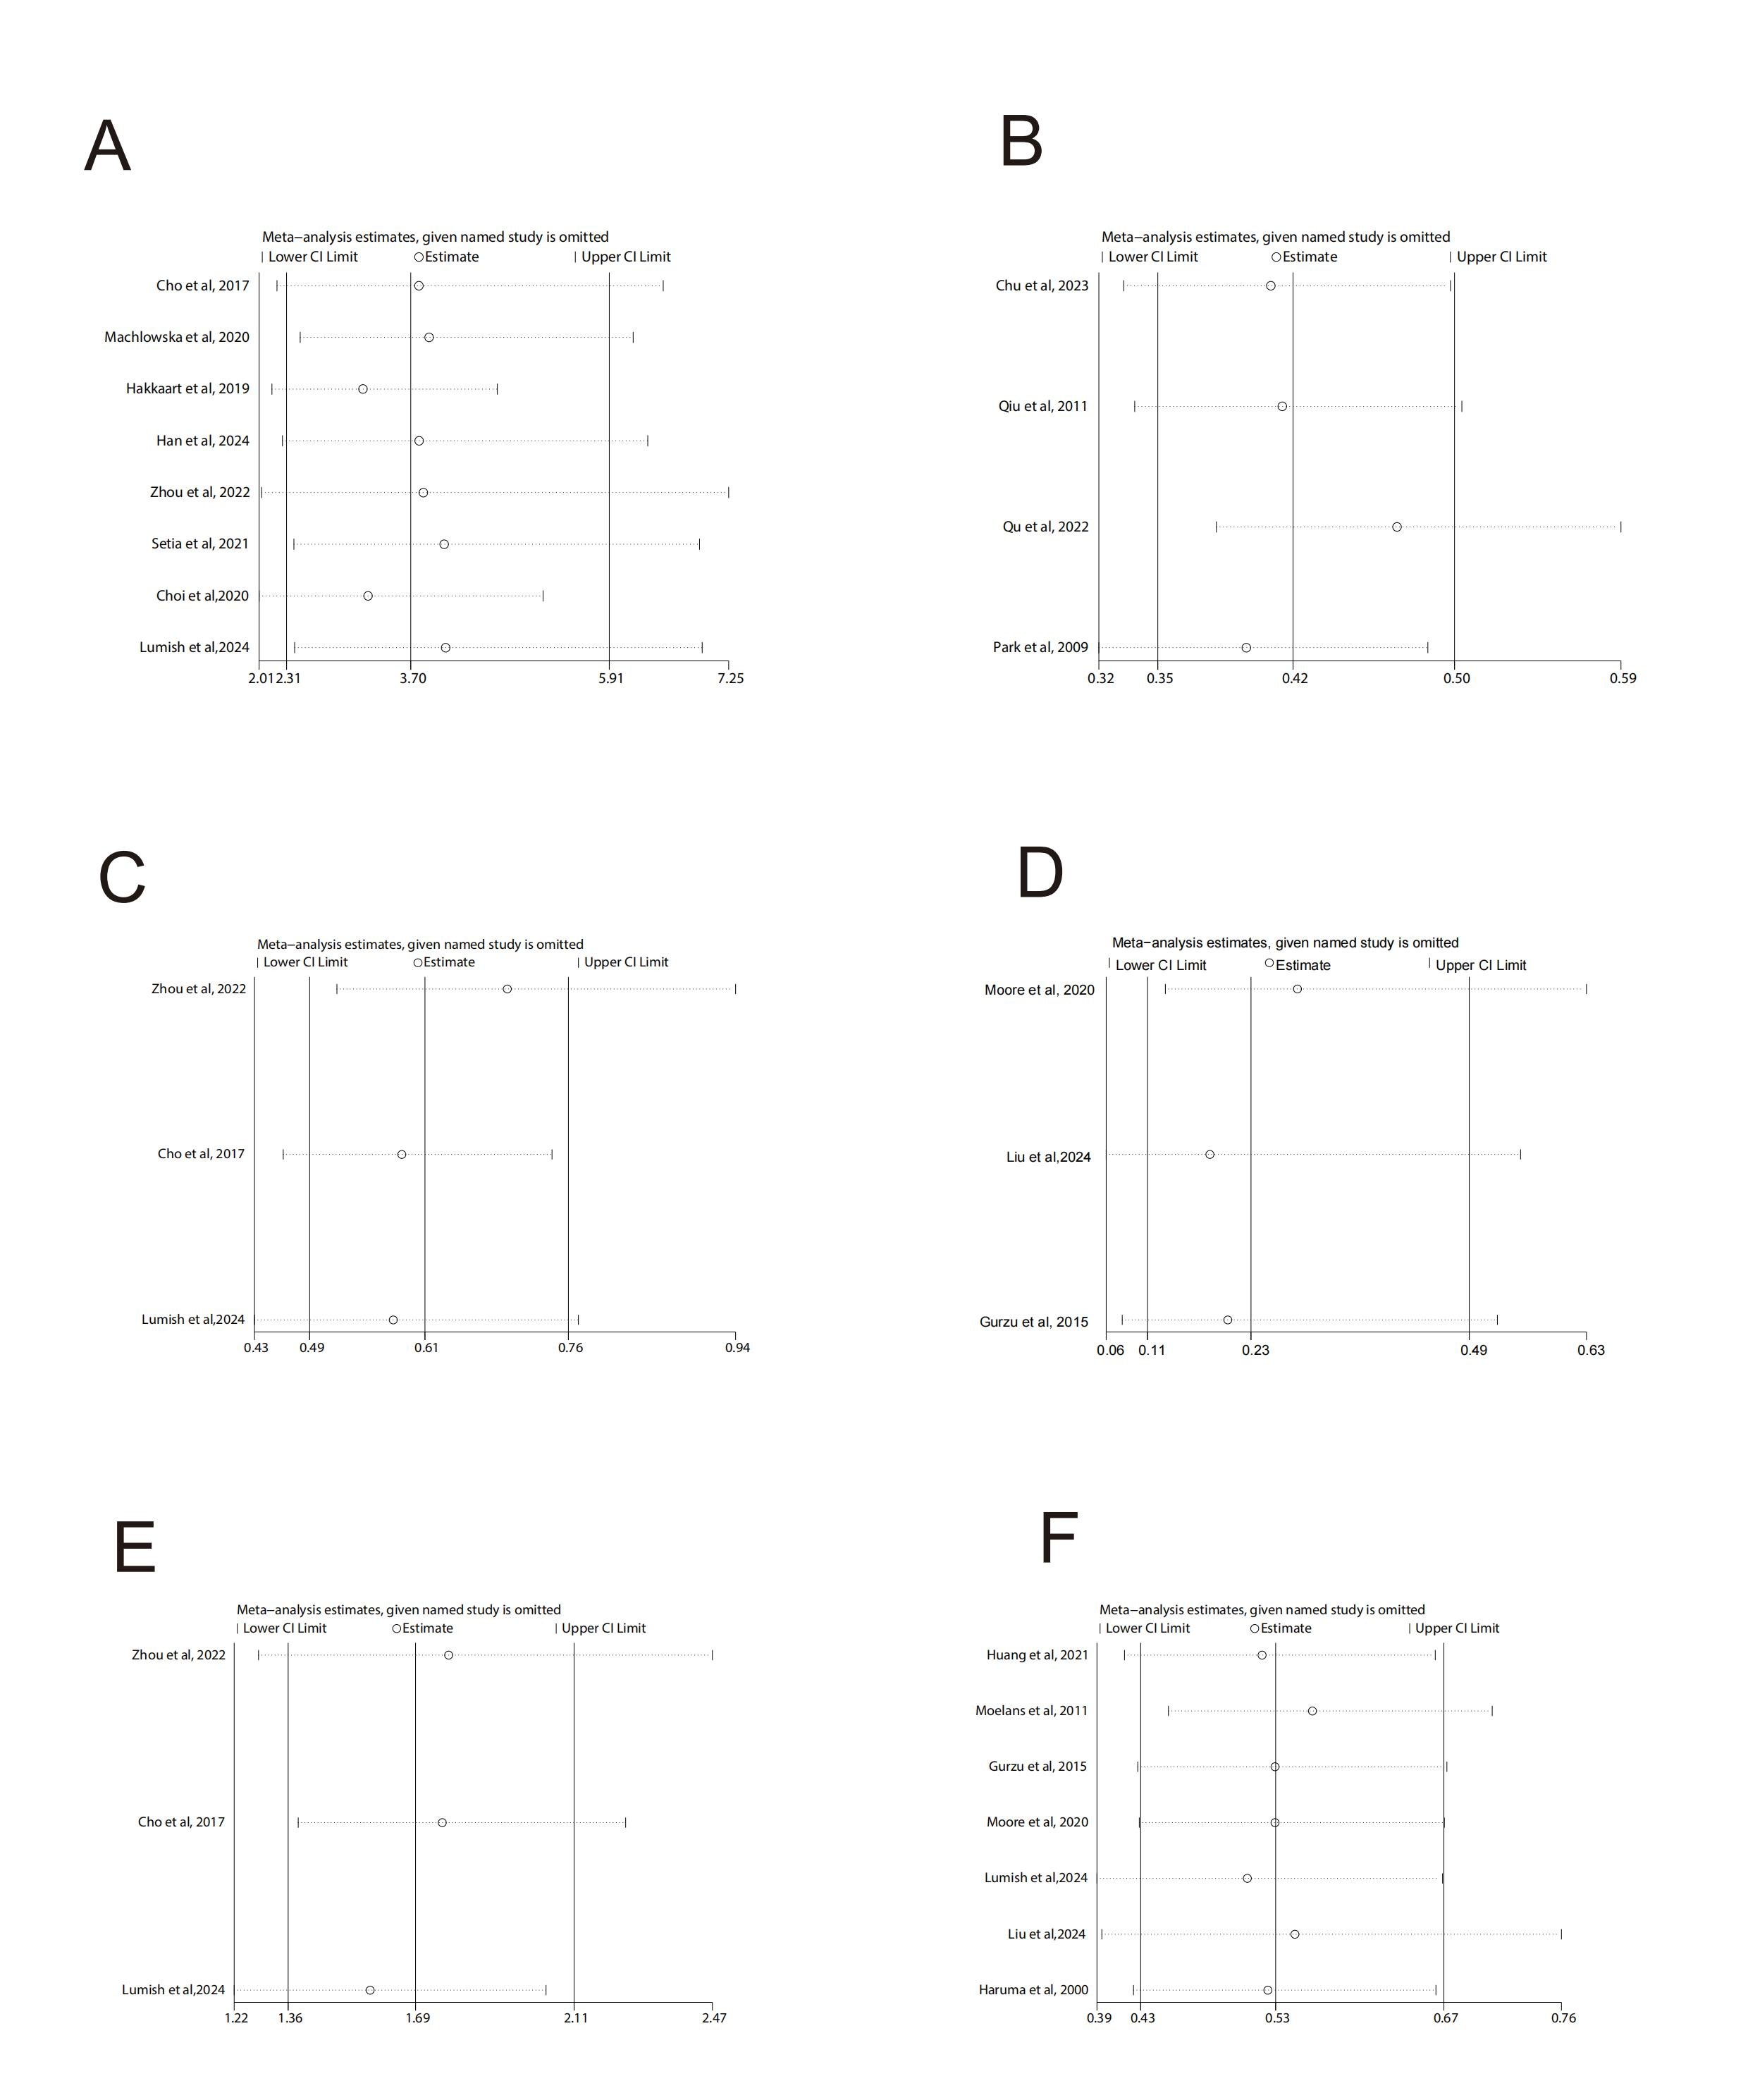


**Supplementary Fig. S1.** Sensitivity analyses demonstrated that the results were robust and stable for all tested variables, including (A) *CDH1* mutation, (B) CEA, (C) CIN subtype, (D) dMMR/MSI-H, (E) GS subtype, and (F) HER2.


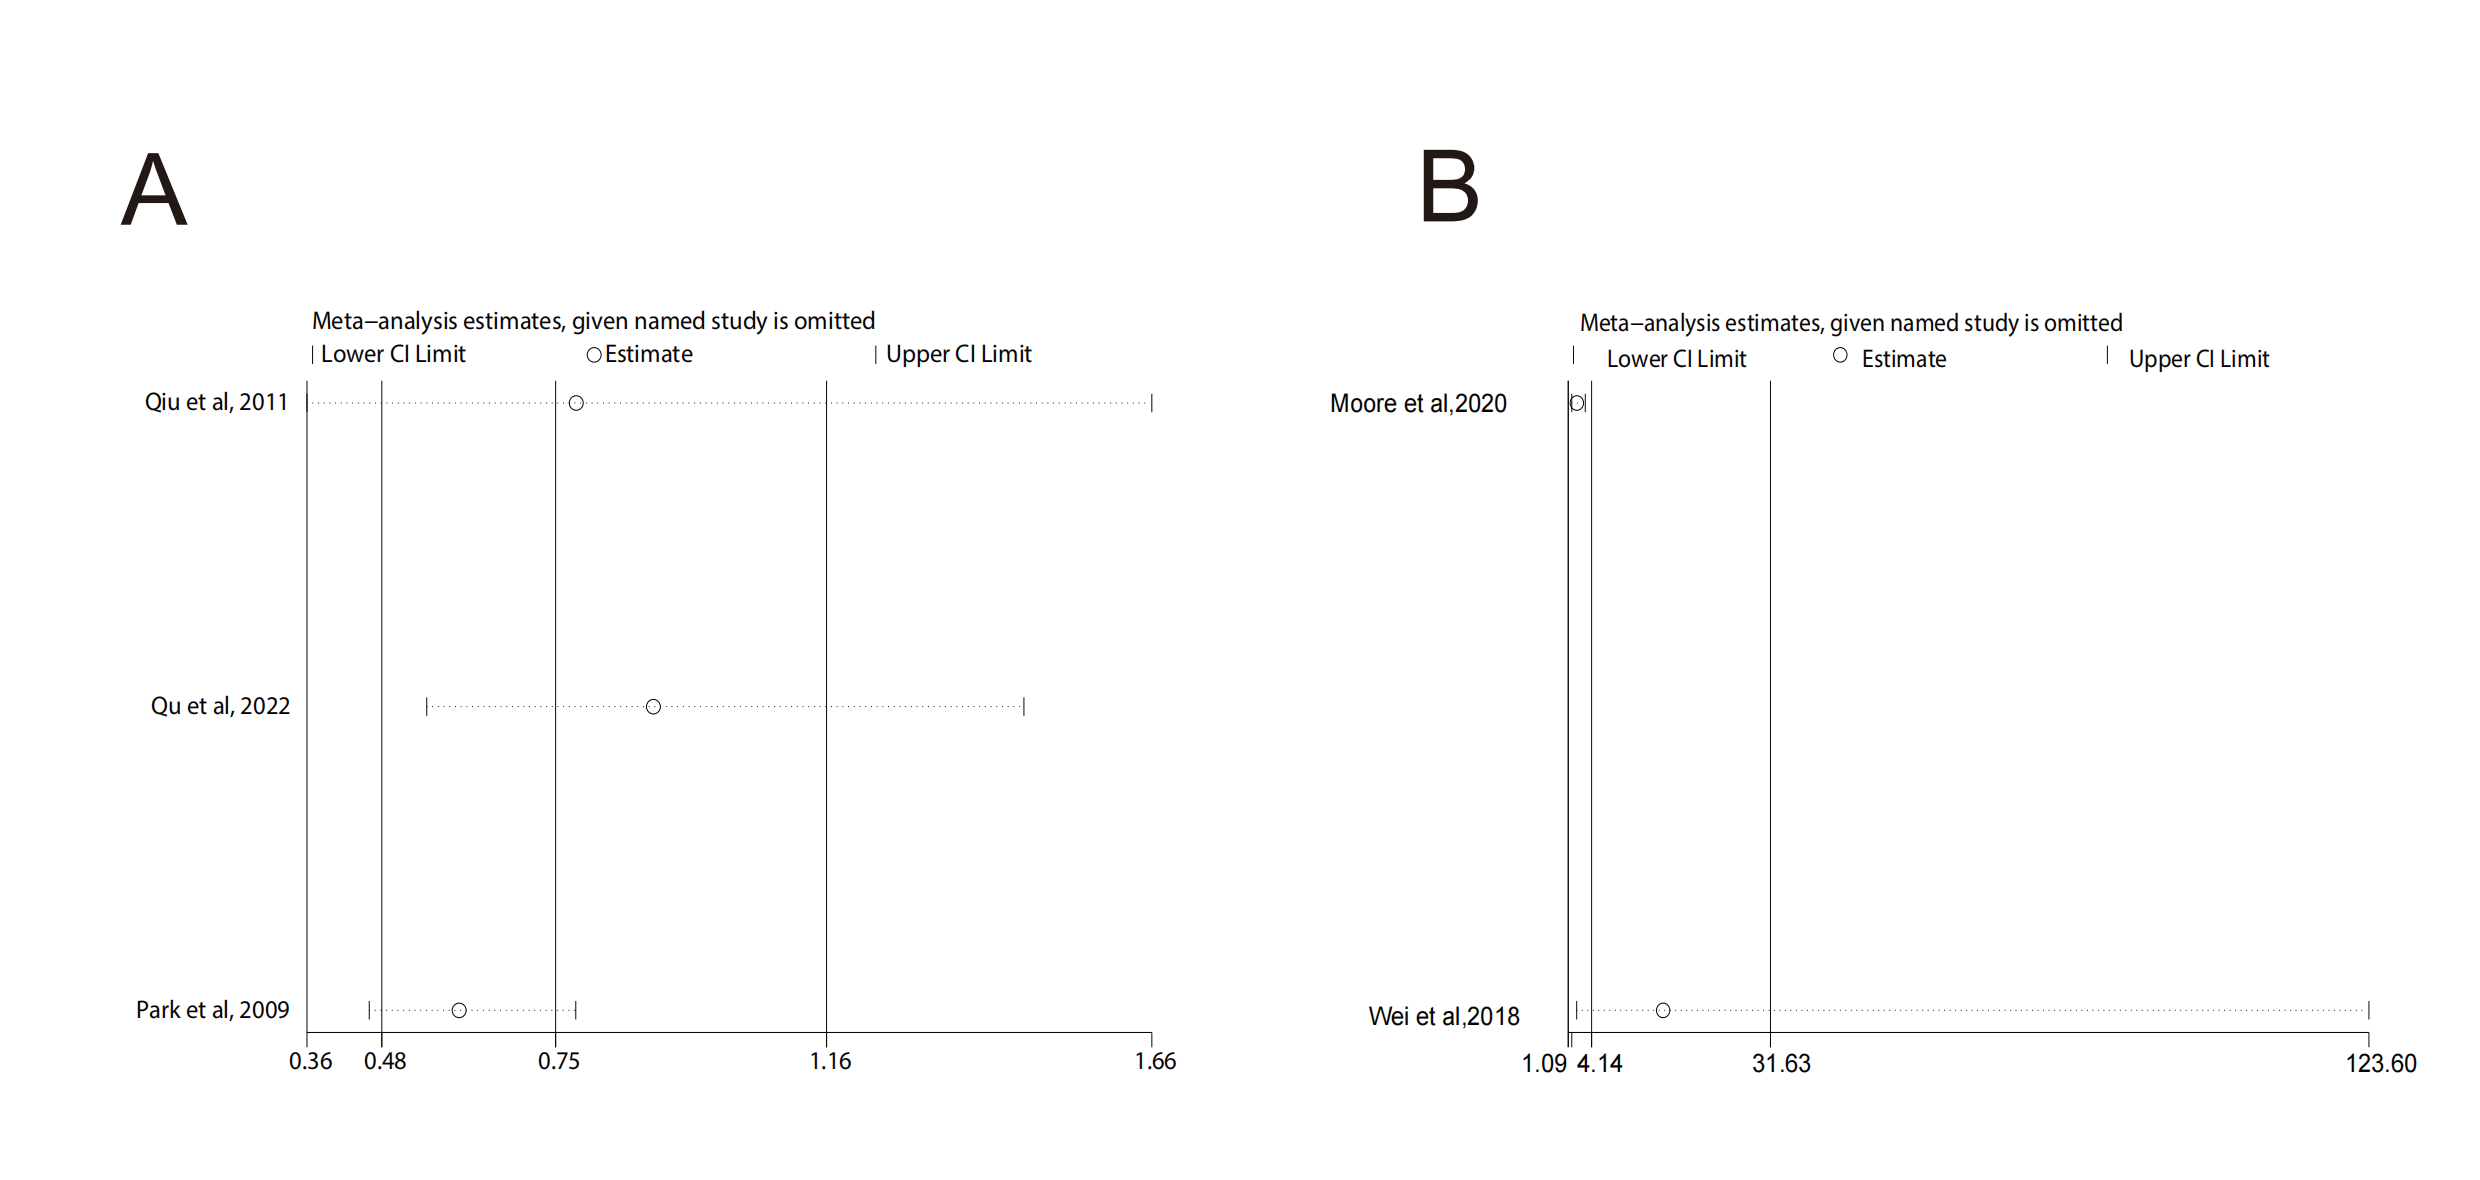


**Supplementary Fig. S2.** Sensitivity analysis showed that the result for (A) CA19-9 was unstable. Although (B) PD-L1 appeared stable in the analysis, the result was derived from only two studies, limiting the robustness of this finding.
