# Supplementary material for: Molecular features of early- vs. late-onset gastric cancer: a systematic review and meta-analysis
Source: Research Square preprint supplement (doi:10.21203/rs.3.rs-6435874/v1), 2025-05-16
Supplement: Supplementary file 4 [file c9ad3c94c985e555ed3a71d1.docx]

**Literature Search Strategy**

Date of search: February 24, 2025

Databases searched: PubMed, Embase, Web of Science

**PubMed search terms:**

#1: (Stomach Neoplasms[MeSH Terms]) OR (Neoplasm, Stomach[Title/Abstract]) OR (Stomach Neoplasm[Title/Abstract]) OR (Gastric Neoplasms[Title/Abstract]) OR (Gastric Neoplasm[Title/Abstract]) OR (Neoplasm, Gastric[Title/Abstract]) OR (Neoplasms, Gastric[Title/Abstract]) OR (Neoplasms, Stomach[Title/Abstract]) OR (Cancer of Stomach[Title/Abstract]) OR (Stomach Cancers[Title/Abstract]) OR (Cancer of the Stomach[Title/Abstract]) OR (Gastric Cancer[Title/Abstract]) OR (Cancer, Gastric[Title/Abstract]) OR (Cancers, Gastric[Title/Abstract]) OR (Gastric Cancers[Title/Abstract]) OR (Stomach Cancer[Title/Abstract]) OR (Cancers, Stomach[Title/Abstract]) OR (Cancer, Stomach[Title/Abstract]) OR (Gastric Cancer, Familial Diffuse[Title/Abstract])

#2: (young onset[Title/Abstract]) OR (early onset[Title/Abstract]) OR (young adult*[Title/Abstract]) OR (early-onset[Title/Abstract]) OR (young-onset[Title/Abstract]) OR (adolescen*[Title/Abstract]) OR (under 50[Title/Abstract]) OR (younger than 50[Title/Abstract]) OR (15-49[Title/Abstract]) OR (under 40[Title/Abstract]) OR (younger than 40[Title/Abstract]) OR (under 30[Title/Abstract]) OR (younger than 30[Title/Abstract]) OR (under 20[Title/Abstract]) OR (younger than 20[Title/Abstract])

Final query: #1 AND #2

Number of records retrieved: 853

**Embase search terms:**

#1: 'stomach tumor'/exp OR 'gastric masses (tumor)' OR 'gastric neoplasia' OR 'gastric neoplasm' OR 'gastric subepithelial tumor' OR 'gastric tumor' OR 'gastric tumorigenesis' OR 'gastric tumour' OR 'mucosa tumor, stomach' OR 'mucosa tumour, stomach' OR 'neoplasia of the stomach' OR 'neoplasm of the stomach' OR 'neoplasms of the stomach' OR 'neoplastic gastric' OR 'neoplastic stomach' OR 'stomach mucosa tumor' OR 'stomach mucosa tumour' OR 'stomach neoplasia' OR 'stomach neoplasm' OR 'stomach neoplasms' OR 'stomach tumorigenesis' OR 'stomach tumour' OR 'stomach ulcerated tumor' OR 'stomach ulcerated tumour' OR 'stomach ulcerating tumor' OR 'stomach ulcerating tumour' OR 'tumor of the gastric' OR 'tumor of the stomach' OR 'tumor, stomach mucosa' OR 'tumour of the gastric' OR 'tumour of the stomach' OR 'tumour, stomach mucosa' OR 'stomach tumor'

#2: 'young onset' OR 'early onset' OR 'young adult*' OR 'early-onset' OR 'young-onset' OR 'adolescen*' OR 'under 50' OR 'younger than 50' OR '15-49' OR 'under 40' OR 'younger than 40' OR 'under 30' OR 'younger than 30' OR 'under 20' OR 'younger than 20'

Final query: #1 AND #2

Number of records retrieved: 6,283

**Web of science search terms:**

#1: TS=(Stomach Neoplasms) OR TS=(Neoplasm, Stomach) OR TS=(Stomach Neoplasm) OR TS=(Gastric Neoplasms) OR TS=(Gastric Neoplasm) OR TS=(Neoplasm, Gastric) OR TS=(Neoplasms, Gastric) OR TS=(Neoplasms, Stomach) OR TS=(Cancer of Stomach) OR TS=(Stomach Cancers) OR TS=(Cancer of the Stomach) OR TS=(Gastric Cancer) OR TS=(Cancer, Gastric) OR TS=(Cancers, Gastric) OR TS=(Gastric Cancers) OR TS=(Stomach Cancer) OR TS=(Cancers, Stomach) OR TS=(Cancer, Stomach) OR TS=(Gastric Cancer, Familial Diffuse) OR OR TS=(Malignant Stomach Neoplasm) OR TS=(Gastric Carcinoma) OR TS=(Gastric Adenocarcinoma) OR TS=(Early Gastric Cancer) OR TS=(Advanced Gastric Cancer)

#2: TS=(young onset) OR TS=(early onset) OR TS=(young adult*) OR TS=(early-onset) OR TS=(young-onset) OR TS=(adolescent*) OR TS=(under 50) OR TS=(younger than 50) OR TS=(15-49) OR TS=(under 40) OR TS=(younger than 40) OR TS=(under 30) OR TS=(younger than 30) OR TS=(under 20) OR TS=(younger than 20)

Final query: #1 AND #2

Number of records retrieved: 14,955
